# Supplementary material for: A nonparametric approach toward upper bounds to transit time distribution functions
Source: Copernicus journal article supplement (doi:10.5194/hess-2017-404), 2017-07-17
Supplement: Supplementary file [file hess-2017-404-AC3-supplement.pdf]

My thanks to Referee 4 for the comments.

If the paper is not clear to hydrologists then that is certainly undesirable from my viewpoint.

Some of the points raised are similar to the other reviewers so I have little further comment to make beyond what has been said before, and I am not in any substantial disagreement.

The desirability of a real-world data set is noted. However, it is important to keep a synthetic data set also because only in this way is there a “truth” to measure the method against, artificial though it may be.
